# Supplementary material
Source: PubMed Central journal article supplement (PMC5286957)
Supplement: 2016_152371-Disclosures_and_Contributions.pdf [file 2016_152371-Disclosures_and_Contributions.pdf]

Haematologica  
HAEMATOL/2016/152371  
Version 3

The chemokine CXCR2 antagonist (AZD5069) preserves  
neutrophil-mediated host immunity in non-human primates

Mohib Uddin, Catherine Betts, Ian Robinson, Anna Malmgren, and  
Charles Humfrey

Disclosures: This study was funded by AstraZeneca. M.U., C.B., I.R. & A.M. are full time employees of AstraZeneca and hold shares in this company. C.H. is currently a full time employee of Lubrizol Ltd.

Contributions: M.U. is the primary author and was assisted in writing and editing of this manuscript by C.B., I.R. and C.H. who analysed the data generated by Ricerca Biosciences SAS (France) in this study. All authors (M.U., C.B., I.R., A.M & C.H.) were involved in the drafting of the manuscript revisions and have read and approved the final version before submission
